# Supplementary material for: Short- and Long-Term Effects of Drought on Selected Causes of Mortality in Northern Bangladesh
Source: MDPI journal article supplement (doi:10.3390/ijerph19063425), 2022-03-14
Supplement: s1 [file s1]

Table S1. Bogra significant results with covariates for Model 1

| Drought Index | Mortality Category | Factors  | B     | Lower | Upper | P    | EXP(B) | Lower | Upper |
|---------------|--------------------|----------|-------|-------|-------|------|--------|-------|-------|
| 3SPI          | NC                 | temp     | -0.03 | -0.05 | -0.01 | 0.00 | 0.97   | 0.95  | 0.99  |
|               | CD                 | temp     | -0.04 | -0.08 | -0.01 | 0.01 | 0.96   | 0.92  | 0.99  |
|               | ID                 | temp     | -0.06 | -0.11 | -0.01 | 0.01 | 0.94   | 0.90  | 0.99  |
|               | ID                 | humidity | 0.04  | 0.01  | 0.07  | 0.01 | 1.04   | 1.01  | 1.07  |
| 12SPI         | NC                 | temp     | -0.04 | -0.05 | -0.02 | 0.00 | 0.96   | 0.95  | 0.98  |
|               | CD                 | temp     | -0.04 | -0.07 | 0.00  | 0.03 | 0.96   | 0.93  | 1.00  |
|               | RD                 | temp     | -0.04 | -0.07 | 0.00  | 0.03 | 0.96   | 0.93  | 1.00  |
|               | ID                 | temp     | -0.07 | -0.12 | -0.02 | 0.00 | 0.93   | 0.89  | 0.98  |
|               | ID                 | humidity | 0.03  | 0.00  | 0.06  | 0.03 | 1.03   | 1.00  | 1.07  |
| 3SPEI         | NC                 | temp     | -0.04 | -0.05 | -0.02 | 0.00 | 0.96   | 0.95  | 0.98  |
|               | CD                 | temp     | -0.04 | -0.07 | -0.01 | 0.02 | 0.96   | 0.93  | 0.99  |
|               | RD                 | temp     | -0.04 | -0.07 | 0.00  | 0.02 | 0.96   | 0.93  | 1.00  |
|               | ID                 | temp     | -0.07 | -0.12 | -0.02 | 0.01 | 0.93   | 0.89  | 0.98  |
|               | ID                 | humidity | 0.04  | 0.00  | 0.07  | 0.03 | 1.04   | 1.00  | 1.07  |
| 12SPEI        | NC                 | temp     | -0.04 | -0.05 | -0.02 | 0.00 | 0.96   | 0.95  | 0.98  |
|               | CD                 | temp     | -0.04 | -0.07 | -0.01 | 0.01 | 0.96   | 0.93  | 0.99  |
|               | RD                 | temp     | -0.03 | -0.07 | 0.00  | 0.05 | 0.97   | 0.93  | 1.00  |
|               | ID                 | temp     | -0.07 | 0.03  | -0.12 | 0.01 | 0.94   | 0.89  | 0.99  |

<sup>1</sup>No drought used as reference. \*NC, natural cause, CD, cardiovascular disease, RD, respiratory disease, ID, infectious disease, SU, suicide, temp, temperature.

Table S2: Dinajpur significant results with covariates for Model 1

| Drought Index | Mortality Category | Factors  | B     | Lower | Upper | P    | EXP(B) | Lower | Upper |
|---------------|--------------------|----------|-------|-------|-------|------|--------|-------|-------|
| 3SPI          | NC                 | temp     | -0.03 | -0.05 | -0.01 | 0.00 | 0.97   | 0.95  | 0.99  |
|               | CD                 | humidity | -0.02 | -0.04 | 0.00  | 0.03 | 0.96   | 0.93  | 1.00  |
|               | RD                 | temp     | -0.04 | -0.07 | 0.00  | 0.03 | 1.04   | 1.00  | 1.07  |
|               | ID                 | humidity | 0.04  | 0.00  | 0.07  | 0.03 | 1.04   | 1.00  | 1.07  |
| 12SPI         | NC                 | temp     | -0.03 | -0.05 | -0.01 | 0.00 | 0.97   | 0.95  | 0.99  |
|               | CD                 | humidity | -0.02 | -0.04 | 0.00  | 0.03 | 0.98   | 0.96  | 1.00  |
|               | ID                 | humidity | 0.04  | 0.00  | 0.07  | 0.03 | 1.04   | 1.00  | 1.07  |
| 3SPEI         | NC                 | temp     | -0.03 | -0.05 | -0.01 | 0.00 | 0.97   | 0.95  | 0.99  |
|               | RD                 | temp     | -0.03 | -0.06 | 0.00  | 0.03 | 0.97   | 0.94  | 1.00  |
|               | ID                 | humidity | 0.03  | 0.00  | 0.06  | 0.03 | 1.03   | 1.00  | 1.07  |
| 12SPEI        | NC                 | temp     | -0.03 | -0.05 | -0.01 | 0.01 | 0.97   | 0.95  | 0.99  |
|               | CD                 | humidity | -0.02 | -0.04 | 0.00  | 0.03 | 0.98   | 0.96  | 1.00  |
|               | ID                 | humidity | 0.04  | 0.00  | 0.07  | 0.03 | 1.04   | 1.00  | 1.07  |

<sup>1</sup>No drought used as reference. \*NC, natural cause, CD, cardiovascular disease, RD, respiratory disease, ID, infectious disease, SU, suicide, temp, temperature

Table S3: Ishurdi significant results with covariates for Model 1

| Drought Index | Mortality Category | Factors | B     | Lower | Upper | P    | EXP(B) | Lower | Upper |
|---------------|--------------------|---------|-------|-------|-------|------|--------|-------|-------|
| <b>3SPI</b>   | NC                 | temp    | -0.04 | -0.06 | -0.02 | 0.00 | 0.96   | 0.94  | 0.98  |
|               | CD                 | temp    | -0.04 | -0.07 | -0.02 | 0.00 | 0.96   | 0.93  | 0.98  |
|               | RD                 | temp    | -0.05 | -0.09 | -0.01 | 0.01 | 0.95   | 0.92  | 0.99  |
| <b>12SPI</b>  | NC                 | temp    | -0.04 | -0.06 | -0.02 | 0.00 | 0.96   | 0.95  | 0.98  |
|               | CD                 | temp    | -0.04 | -0.07 | -0.01 | 0.01 | 0.96   | 0.94  | 0.99  |
|               | RD                 | temp    | -0.05 | -0.09 | -0.01 | 0.02 | 0.95   | 0.92  | 0.99  |
| <b>3SPEI</b>  | NC                 | temp    | -0.03 | -0.05 | -0.01 | 0.00 | 0.97   | 0.95  | 0.99  |
|               | CD                 | temp    | -0.04 | -0.07 | -0.01 | 0.01 | 0.96   | 0.93  | 0.99  |
|               | RD                 | temp    | -0.04 | -0.08 | 0.00  | 0.04 | 0.96   | 0.92  | 1.00  |
| <b>12SPEI</b> | NC                 | temp    | -0.04 | -0.06 | -0.02 | 0.00 | 0.97   | 0.95  | 0.98  |
|               | CD                 | temp    | -0.04 | -0.07 | -0.01 | 0.01 | 0.96   | 0.94  | 0.99  |
|               | RD                 | temp    | -0.05 | -0.09 | -0.01 | 0.02 | 0.95   | 0.92  | 0.99  |

<sup>1</sup>No drought used as reference. \*NC, natural cause, CD, cardiovascular disease, RD, respiratory disease, ID, infectious disease, SU, suicide, temp, temperature

Table S4: Rajshahi significant results with covariates for Model 1

| Drought Index | Mortality Category | Factors  | B     | Lower | Upper | P    | EXP(B) | Lower | Upper |
|---------------|--------------------|----------|-------|-------|-------|------|--------|-------|-------|
| <b>3SPI</b>   | NC                 | temp     | -0.04 | -0.05 | -0.03 | 0.00 | 0.96   | 0.95  | 0.97  |
|               | CD                 | temp     | -0.04 | -0.06 | -0.01 | 0.00 | 0.96   | 0.94  | 0.99  |
|               | RD                 | temp     | -0.07 | -0.09 | -0.05 | 0.00 | 0.94   | 0.91  | 0.96  |
|               | ID                 | temp     | -0.05 | -0.08 | -0.02 | 0.00 | 0.95   | 0.92  | 0.98  |
|               | SU                 | temp     | 0.10  | 0.01  | 0.19  | 0.03 | 1.10   | 1.01  | 1.21  |
| <b>12SPI</b>  | NC                 | temp     | -0.04 | -0.05 | -0.03 | 0.00 | 0.96   | 0.95  | 0.98  |
|               | CD                 | temp     | -0.03 | -0.05 | -0.01 | 0.00 | 0.97   | 0.95  | 0.99  |
|               | RD                 | temp     | -0.06 | -0.08 | -0.04 | 0.00 | 0.94   | 0.92  | 0.96  |
|               | ID                 | temp     | -0.05 | -0.08 | -0.03 | 0.00 | 0.95   | 0.92  | 0.97  |
|               | SU                 | temp     | 0.11  | 0.02  | 0.20  | 0.02 | 1.11   | 1.02  | 1.22  |
| <b>3SPEI</b>  | NC                 | temp     | -0.04 | -0.05 | -0.03 | 0.00 | 0.96   | 0.95  | 0.97  |
|               | CD                 | temp     | -0.03 | -0.05 | -0.01 | 0.00 | 0.97   | 0.95  | 0.99  |
|               | RD                 | temp     | -0.06 | -0.08 | -0.04 | 0.00 | 0.94   | 0.92  | 0.96  |
|               | ID                 | temp     | -0.05 | -0.08 | -0.03 | 0.00 | 0.95   | 0.92  | 0.97  |
|               | SU                 | temp     | 0.10  | 0.02  | 0.19  | 0.02 | 1.11   | 1.02  | 1.21  |
| <b>12SPEI</b> | NC                 | temp     | -0.04 | -0.05 | -0.03 | 0.00 | 0.96   | 0.95  | 0.97  |
|               | CD                 | temp     | -0.04 | -0.06 | -0.02 | 0.00 | 0.96   | 0.94  | 0.98  |
|               | RD                 | temp     | -0.06 | -0.09 | -0.04 | 0.00 | 0.94   | 0.92  | 0.96  |
|               | ID                 | temp     | -0.06 | -0.09 | -0.03 | 0.00 | 0.94   | 0.92  | 0.97  |
|               | ID                 | humidity | -0.02 | -0.03 | 0.00  | 0.03 | 0.98   | 0.97  | 1.00  |
|               | SU                 | temp     | 0.10  | 0.01  | 0.19  | 0.03 | 1.11   | 1.01  | 1.21  |

<sup>1</sup>No drought used as reference. \*NC, natural cause, CD, cardiovascular disease, RD, respiratory disease, ID, infectious disease, SU, suicide, temp, temperature

Table S5: Rangpur significant results with covariates for Model 1

| Drought Index | Mortality Category | Factors | B     | Lower | Upper | P    | EXP(B) | Lower | Upper |
|---------------|--------------------|---------|-------|-------|-------|------|--------|-------|-------|
| <b>3SPI</b>   | NC                 | temp    | -0.04 | -0.06 | -0.03 | 0.00 | 0.96   | 0.95  | 0.97  |
|               | CD                 | temp    | -0.05 | -0.07 | -0.03 | 0.00 | 0.95   | 0.93  | 0.97  |
|               | RD                 | temp    | -0.05 | -0.08 | -0.02 | 0.00 | 0.95   | 0.92  | 0.98  |
| <b>12SPI</b>  | NC                 | temp    | -0.04 | -0.06 | -0.03 | 0.00 | 0.96   | 0.95  | 0.98  |
|               | CD                 | temp    | -0.04 | -0.07 | -0.02 | 0.00 | 0.96   | 0.93  | 0.98  |
| <b>3SPEI</b>  | NC                 | temp    | -0.04 | -0.05 | -0.02 | 0.00 | 0.96   | 0.95  | 0.98  |
|               | CD                 | temp    | -0.04 | -0.07 | -0.02 | 0.00 | 0.96   | 0.93  | 0.98  |
|               | RD                 | temp    | -0.05 | -0.08 | -0.02 | 0.00 | 0.95   | 0.93  | 0.98  |
| <b>12SPEI</b> | NC                 | temp    | -0.04 | -0.06 | -0.02 | 0.00 | 0.96   | 0.95  | 0.98  |
|               | CD                 | temp    | -0.04 | -0.07 | -0.02 | 0.00 | 0.96   | 0.93  | 0.98  |
|               | RD                 | temp    | -0.05 | -0.07 | -0.02 | 0.00 | 0.95   | 0.93  | 0.98  |

<sup>1</sup>No drought used as reference. \*NC, natural cause, CD, cardiovascular disease, RD, respiratory disease, ID, infectious disease, SU, suicide, temp, temperature

Table S6. Syedpur significant results with covariates for Model 1

| Drought Index | Mortality Category | Factors  | B     | Lower | Upper | P    | EXP(B) | Lower | Upper |
|---------------|--------------------|----------|-------|-------|-------|------|--------|-------|-------|
| <b>3SPI</b>   | NC                 | temp     | -0.05 | -0.07 | -0.02 | 0.00 | 0.96   | 0.93  | 0.98  |
|               | CD                 | temp     | -0.04 | -0.07 | 0.00  | 0.04 | 0.97   | 0.93  | 1.00  |
|               | RD                 | temp     | -0.06 | -0.09 | -0.02 | 0.00 | 0.94   | 0.91  | 0.98  |
|               | ID                 | temp     | -0.05 | -0.10 | -0.01 | 0.02 | 0.95   | 0.91  | 0.99  |
|               | SU                 | Humidity | 0.09  | 0.00  | 0.18  | 0.04 | 1.10   | 1.00  | 1.20  |
| <b>12SPI</b>  | NC                 | temp     | -0.05 | -0.07 | -0.02 | 0.00 | 0.95   | 0.93  | 0.98  |
|               | RD                 | temp     | -0.06 | -0.09 | -0.02 | 0.00 | 0.94   | 0.91  | 0.98  |
|               | ID                 | temp     | -0.06 | -0.11 | -0.01 | 0.03 | 0.94   | 0.90  | 0.99  |
| <b>3SPEI</b>  | NC                 | temp     | -0.05 | -0.07 | -0.03 | 0.00 | 0.95   | 0.93  | 0.97  |
|               | CD                 | temp     | -0.04 | -0.07 | 0.00  | 0.04 | 0.96   | 0.93  | 1.00  |
|               | RD                 | temp     | -0.07 | -0.10 | -0.03 | 0.00 | 0.94   | 0.90  | 0.97  |
|               | ID                 | temp     | -0.07 | -0.12 | -0.02 | 0.01 | 0.94   | 0.89  | 0.98  |
|               | NC                 | temp     | -0.04 | -0.07 | -0.02 | 0.00 | 0.96   | 0.94  | 0.98  |
|               | RD                 | temp     | -0.06 | -0.09 | -0.02 | 0.00 | 0.94   | 0.91  | 0.98  |

<sup>1</sup>No drought used as reference. \*NC, natural cause, CD, cardiovascular disease, RD, respiratory disease, ID, infectious disease, SU, suicide, temp, temperature

Table S7: Bogra significant results with covariates for Model 2

| Drought Index | Mortality Category | Factors  | B     | Lower | Upper | P    | EXP(B) | Lower | Upper |
|---------------|--------------------|----------|-------|-------|-------|------|--------|-------|-------|
| <b>3SPI</b>   | NC                 | Humidity | 0.01  | 0.00  | 0.03  | 0.06 | 1.01   | 1.00  | 1.03  |
|               | NC                 | THE (\$) | -0.09 | -0.14 | -0.05 | 0.00 | 0.91   | 0.87  | 0.96  |
|               | RD                 | THE (\$) | -0.14 | -0.24 | -0.04 | 0.01 | 0.87   | 0.78  | 0.97  |
| <b>12SPI</b>  | NC                 | THE (\$) | -0.10 | -0.15 | -0.05 | 0.00 | 0.90   | 0.86  | 0.95  |
|               | RD                 | THE (\$) | -0.16 | -0.26 | -0.06 | 0.00 | 0.85   | 0.77  | 0.94  |
| <b>3SPEI</b>  | NC                 | Humidity | 0.01  | 0.00  | 0.03  | 0.05 | 1.01   | 1.00  | 1.03  |
|               | NC                 | THE (\$) | -0.09 | -0.14 | -0.05 | 0.00 | 0.91   | 0.87  | 0.95  |
|               | RD                 | THE (\$) | -0.16 | -0.27 | -0.06 | 0.00 | 0.85   | 0.77  | 0.94  |
| <b>12SPEI</b> | NC                 | THE (\$) | -0.10 | -0.15 | -0.05 | 0.00 | 0.90   | 0.86  | 0.95  |
|               | RD                 | THE (\$) | -0.16 | -0.26 | -0.05 | 0.00 | 0.86   | 0.77  | 0.95  |

<sup>1</sup>No drought used as reference. \*NC, natural cause, CD, cardiovascular disease, RD, respiratory disease, ID, infectious disease, SU, suicide, temp, temperature, THE, total health expenditure.

Table S8: Ishurdi significant results with covariates for Model 2

| Drought Index | Mortality Category | Factors  | B     | Lower | Upper | P    | EXP(B) | Lower | Upper |
|---------------|--------------------|----------|-------|-------|-------|------|--------|-------|-------|
| <b>3SPI</b>   | NC                 | THE (\$) | -0.08 | -0.14 | -0.02 | 0.01 | 0.92   | 0.87  | 0.98  |
|               | RD                 | THE (\$) | -0.13 | -0.26 | -0.01 | 0.03 | 0.87   | 0.77  | 0.99  |
|               | ID                 | THE (\$) | -0.19 | -0.36 | -0.01 | 0.04 | 0.83   | 0.70  | 0.99  |
| <b>12SPI</b>  | NC                 | THE (\$) | -0.10 | -0.16 | -0.04 | 0.00 | 0.90   | 0.85  | 0.96  |
|               | CD                 | temp     | -0.07 | -0.14 | 0.00  | 0.05 | 0.93   | 0.87  | 1.00  |
|               | CD                 | THE (\$) | -0.11 | -0.20 | -0.02 | 0.02 | 0.90   | 0.82  | 0.98  |
|               | ID                 | temp     | -0.14 | -0.26 | -0.02 | 0.02 | 0.87   | 0.77  | 0.98  |
|               | ID                 | THE (\$) | -0.19 | -0.36 | -0.03 | 0.02 | 0.82   | 0.70  | 0.97  |
| <b>3SPEI</b>  | NC                 | THE (\$) | -0.08 | -0.14 | -0.01 | 0.02 | 0.93   | 0.87  | 0.99  |
|               | RD                 | THE (\$) | -0.14 | -0.27 | -0.01 | 0.03 | 0.87   | 0.77  | 0.99  |
|               | ID                 | temp     | -0.13 | -0.25 | -0.01 | 0.03 | 0.88   | 0.78  | 0.99  |
|               | ID                 | THE (\$) | -0.18 | -0.33 | -0.03 | 0.02 | 0.83   | 0.72  | 0.97  |
| <b>12SPEI</b> | NC                 | THE (\$) | -0.09 | -0.15 | -0.02 | 0.01 | 0.92   | 0.86  | 0.98  |
|               | CD                 | THE (\$) | -0.10 | -0.19 | 0.00  | 0.04 | 0.91   | 0.83  | 1.00  |
|               | ID                 | temp     | -0.14 | -0.26 | -0.03 | 0.02 | 0.87   | 0.77  | 0.98  |
|               | ID                 | THE (\$) | -0.18 | -0.34 | -0.01 | 0.04 | 0.84   | 0.71  | 0.99  |

<sup>1</sup>No drought used as reference. \*NC, natural cause, CD, cardiovascular disease, RD, respiratory disease, ID, infectious disease, SU, suicide, temp, temperature, THE, total health expenditure

Table S9. Rajshahi significant results with covariates for Model 2

| Drought Index | Mortality Category | Factors     | B     | Lower | Upper | P    | EXP(B) | Lower | Upper |
|---------------|--------------------|-------------|-------|-------|-------|------|--------|-------|-------|
| <b>3SPI</b>   | NC                 | Temperature | -0.05 | -0.08 | -0.02 | 0.00 | 0.95   | 0.92  | 0.98  |
|               | NC                 | THE (\$)    | -0.04 | -0.08 | 0.00  | 0.05 | 0.96   | 0.92  | 1.00  |
|               | CD                 | THE (\$)    | -0.07 | -0.14 | 0.00  | 0.04 | 0.93   | 0.87  | 1.00  |
|               | RD                 | Temp        | -0.16 | -0.21 | -0.10 | 0.00 | 0.85   | 0.81  | 0.90  |
|               | ID                 | Temp        | -0.09 | -0.16 | -0.02 | 0.01 | 0.91   | 0.85  | 0.98  |
|               | ID                 | Humidity    | -0.04 | -0.07 | -0.01 | 0.01 | 0.96   | 0.94  | 0.99  |
| <b>12SPI</b>  | NC                 | Temp        | -0.06 | -0.09 | -0.03 | 0.00 | 0.94   | 0.92  | 0.97  |
|               | CD                 | THE (\$)    | -0.07 | -0.14 | -0.01 | 0.03 | 0.93   | 0.87  | 0.99  |
|               | RD                 | Temp        | -0.16 | -0.21 | -0.10 | 0.00 | 0.86   | 0.81  | 0.91  |
|               | ID                 | Temp        | -0.10 | -0.17 | -0.03 | 0.00 | 0.91   | 0.85  | 0.97  |
|               | ID                 | Humidity    | -0.04 | -0.07 | -0.01 | 0.00 | 0.96   | 0.94  | 0.99  |
| <b>3SPEI</b>  | NC                 | Temperature | -0.05 | -0.08 | -0.02 | 0.00 | 0.95   | 0.92  | 0.98  |
|               | NC                 | Humidity    | -0.01 | -0.02 | 0.00  | 0.03 | 0.99   | 0.98  | 1.00  |
|               | NC                 | THE (\$)    | -0.04 | -0.08 | 0.00  | 0.05 | 0.96   | 0.92  | 1.00  |
|               | CD                 | THE (\$)    | -0.07 | -0.14 | -0.01 | 0.03 | 0.93   | 0.87  | 0.99  |
|               | RD                 | Tempe       | -0.15 | -0.21 | -0.09 | 0.00 | 0.86   | 0.81  | 0.91  |
|               | ID                 | Temperature | -0.10 | -0.16 | -0.03 | 0.01 | 0.91   | 0.85  | 0.97  |
|               | ID                 | Humidity    | -0.04 | -0.07 | -0.01 | 0.01 | 0.96   | 0.93  | 0.99  |
| <b>12SPEI</b> | NC                 | Temperature | -0.06 | -0.09 | -0.03 | 0.00 | 0.94   | 0.92  | 0.97  |
|               | NC                 | Humidity    | -0.01 | -0.02 | 0.00  | 0.04 | 0.99   | 0.98  | 1.00  |
|               | CD                 | THE (\$)    | -0.07 | -0.13 | 0.00  | 0.05 | 0.94   | 0.88  | 1.00  |
|               | RD                 | Temp        | -0.16 | -0.22 | -0.10 | 0.00 | 0.85   | 0.81  | 0.90  |
|               | ID                 | Temperature | -0.11 | -0.18 | -0.05 | 0.00 | 0.89   | 0.83  | 0.95  |
|               | ID                 | Humidity    | -0.04 | -0.07 | -0.02 | 0.00 | 0.96   | 0.93  | 0.99  |
|               | ID                 | THE (\$)    | -0.10 | -0.21 | 0.00  | 0.05 | 0.90   | 0.81  | 1.00  |

<sup>1</sup>No drought used as reference. \*NC, natural cause, CD, cardiovascular disease, RD, respiratory disease, ID, infectious disease, SU, suicide, temp, temperature, THE, total health expenditure

Table S10: Rangpur significant results with covariates for Model 2

| Drought Index | Mortality Category | Factors  | B     | Lower | Upper | P    | EXP(B) | Lower | Upper |
|---------------|--------------------|----------|-------|-------|-------|------|--------|-------|-------|
| <b>3SPI</b>   | NC                 | Temp     | -0.05 | -0.08 | -0.01 | 0.01 | 0.95   | 0.92  | 0.99  |
|               | CD                 | Temp     | -0.06 | -0.11 | -0.01 | 0.02 | 0.94   | 0.89  | 0.99  |
| <b>12SPI</b>  | NC                 | Temp     | -0.05 | -0.08 | -0.01 | 0.01 | 0.96   | 0.92  | 0.99  |
|               | RD                 | THE (\$) | 0.15  | 0.01  | 0.30  | 0.04 | 1.17   | 1.01  | 1.35  |
| <b>3SPEI</b>  | NC                 | Temp     | -0.05 | -0.08 | -0.01 | 0.01 | 0.96   | 0.92  | 0.99  |
|               | RD                 | THE (\$) | 0.15  | 0.01  | 0.28  | 0.04 | 1.16   | 1.01  | 1.33  |
|               | SU                 | THE (\$) | -0.44 | -0.86 | -0.03 | 0.04 | 0.64   | 0.42  | 0.97  |
| <b>12SPEI</b> | NC                 | Temp     | -0.05 | -0.08 | -0.01 | 0.01 | 0.96   | 0.92  | 0.99  |
|               | RD                 | THE (\$) | 0.16  | 0.01  | 0.31  | 0.03 | 1.17   | 1.01  | 1.36  |

<sup>1</sup>No drought used as reference. \*NC, natural cause, CD, cardiovascular disease, RD, respiratory disease, ID, infectious disease, SU, suicide, temp, temperature, THE, total health expenditure

Table S11: Syedpur significant results with covariates for Model 2

| <b>Drought Index</b> | <b>Mortality Category</b> | <b>Factors</b> | <b>B</b> | <b>Lower</b> | <b>Upper</b> | <b>P</b> | <b>EXP(B)</b> | <b>Lower</b> | <b>Upper</b> |
|----------------------|---------------------------|----------------|----------|--------------|--------------|----------|---------------|--------------|--------------|
| <b>3SPI</b>          | NC                        | Temp           | -0.05    | -0.10        | 0.00         | 0.04     | 0.95          | 0.90         | 1.00         |
| <b>12SPI</b>         | NC                        | Temp           | -0.06    | -0.11        | -0.01        | 0.03     | 0.94          | 0.90         | 0.99         |
| <b>3SPEI</b>         | NC                        | Temp           | -0.06    | -0.11        | -0.01        | 0.02     | 0.94          | 0.89         | 0.99         |
| <b>12SPEI</b>        | NC                        | Temp           | -0.05    | -0.10        | 0.00         | 0.03     | 0.95          | 0.90         | 1.00         |

<sup>1</sup>No drought used as reference. \*NC, natural cause, CD, cardiovascular disease, RD, respiratory disease, ID, infectious disease, SU, suicide, temp, temperature, THE, total health expenditure
